# Supplementary material for: Feeding challenges in early infancy: the role of reflexes, muscle tone, and developmental milestones
Source: PeerJ. 2025 Aug 22;13:e19777. doi: 10.7717/peerj.19777 (PMC12377356; doi:10.7717/peerj.19777)
Supplement: Supplemental Information 1 [file peerj-13-19777-s001.xlsx]

## Sheet: Study group
	GENDER	PATIENTS	GESTATIONAL WEEK	AGE IN WEEKS AT THE MOMENT OF ASSESSMENT	ORDER OF THE CHILD	ORDER OF THE PREGNANCY	TYPE OF BIRTH	pH UMBILICAL CORD BLOOD	APGAR POINTS AT 5 MINUTES	BIRTH WEIGHT	LENGHT AT BIRTH	TYPE OF MILK	AIMS centyl	PRECHTL	SOWKUT POINTS	SOWKUT f	SOWKUT sten	SOWKUT centyl	THE USE OF BABY'S PACIFIER	BREASTFEEDING	BOTTLE FEEDING	ROOTING REFLEX	PHASIC BITE REFLEX	SNOUT REFLEX	JAW JERK REFLEX	GLABELLAR REFLEX	SUCKING REFLEX	FRONTAL MUSCLES	TEMPORALIS MUSCLES	ORIBUCULARIS ORIS	MASSETER MUSCLES	PTERYGOID MUSCLES	INFRAHYOID MUSCLES	STERNOCLEIDOMASTOID MUSCLE	ARTIFICIAL RESPIRATION	TUBE FEEDING	MULTIPLE PREGNANCY	COMORBIDITIES	REHABILITATION
1.	K	Patient 1	26	14	2	2	2	7.26	5	570	28	3	90	1	6	1	9	94	1	2	1	2	2	1	1	1	1	1	1	1	3	1	3	2	mechanical ventilation, intubation, oxygen therapy	YES	SINGLE PREGNANCY	no	YES
2.	M	Patient 2	26	15	1	1	2	7.1	7	970	37	1	50	4	6	1	9	94	1	2	1	2	1	1	1	1	2	1	2	1	2	2	2	2	mechanical ventilation, oxygen therapy		TRIPLET PREGNANCY	setting sun sign	YES
3.	M	Patient 3	38	1	4	4	1	7.35	8	3990	56	2	90	3	3	2	8	89	2	2	1	2	1	1	2	1	2	3	2	3	3	2	1	1	mechanical ventilation, oxygen therapy		SINGLE PREGNANCY	microcephaly, anencephaly	NO
4.	M	Patient 4	29	8	2	2	2	7.4	8	1280	41	1	90	4	4	4	8	91	1	1	1	1	1	1	1	1	1	1	2	3	3	2	2	2	no	NO	TWIN PREGNANCY	ankyloglossia, labial frenulum attachment	YES
5.	K	Patient 5	34	4	3	3	2	7.34	7	1425	46	2	75	3	12	1	9	97	1	2	1	2	2	2	1	1	2	1	1	3	1	1	2	2	no	YES	TWIN PREGNANCY	no	NO
6.	K	Patient 6	32	4	2	2	2	7.35	9	1380	44.5	2	75	1	8	1	9	96	1	2	2	2	2	2	1	1	1	1	1	1	low muscle tone	low muscle tone	1	2	oxygen therapy	YES	SINGLE PREGNANCY	no	NO
7.	K	Patient 7	32	5	1	1	1	7.12	7	1320	44	4	75	3	1	14	7	80	1	2	1	1	1	1	1	1	1	1	2	3	2	2	2	2	no	NO	SINGLE PREGNANCY	no	NO
8.	K	Patient 8	33	1	1	1	1	7.23	9	1910	47	1	25	1	5	2	8	93	1	1	1	1	2	1	1	1	2	1	1	1	3	3	2	2	no	YES	SINGLE PREGNANCY	no	YES
9.	M	Patient 9	39	1	2	1	2	7.33	9	3280	56	3	90	4	12	1	9	97	1	2	1	1	2	1	1	1	2	1	2	3	3	2	2	3	no	YES	SINGLE PREGNANCY	drug-induced seizures	NO
10.	M	Patient 10	28	12	4	4	2	7.19	8	866	37	3	50	1	0	115	5	38	1	1	1	1	1	1	1	1	1	1	2	3	2	2	1	1	no	NO	SINGLE PREGNANCY	no	NO
11.	M	Patient 11	24	14	3	3	2	7.32	6	615	29	1	90	3	5	2	8	93	1	2	2	2	1	2	1	1	1	1	3	1	2	1	3	3	no	YES	SINGLE PREGNANCY	no	NO
12.	K	Patient 12	39	2	4	4	2	7.34	10	3100	53	1	50	1	5	2	8	93	1	1	2	2	2	1	1	2	1	3	1	1	2	2	1	2	no	YES	SINGLE PREGNANCY	ventricular septal defect	NO
13.	M	Patient 13	33	2	1	1	2	7.29	6	2500	46	2	25	2	7	2	9	95	1	2	1	1	1	1	1	1	1	1	1	1	2	2	2	3	intubation, oxygen therapy	YES	SINGLE PREGNANCY	no	NO
14.	K	Patient 14	39	5.5	1	1	2	7.35	10	3120	49	1	90	1	4	4	8	91	2	1	1	1	2	1	2	1	1	1	1	3	1	1	3	1	no	NO	SINGLE PREGNANCY	no	YES
15.	M	Patient 15	37	4	3	3	2	7.3	8	3300	55	2	90	1	7	2	9	95	1	2	1	1	1	2	1	2	2	1	2	1	2	2	1	1	no	NO	SINGLE PREGNANCY	umbilicial hernia	YES
16.	K	Patient 16	41	12	2	2	1	7.18	10	3985	54	1	50	1	9	1	9	96	1	2	1	1	1	1	1	1	2	1	3	3	3	2	2	2	oxygen therapy	YES	SINGLE PREGNANCY	cleft palate	YES
17.	K	Patient 17	38	12	2	1	2	7.27	10	2940	54	3	50	1	9	1	9	96	1	1	1	1	2	2	1	1	2	3	1	1	3	3	2	2	no	NO	TWIN PREGNANCY	no	YES
18.	M	Patient 18	38	12	2	1	2	7.35	10	2800	53	3	50	1	8	1	9	96	1	1	1	2	1	1	1	1	2	1	2	3	3	3	2	2	no	NO	TWIN PREGNANCY	no	YES
19.	M	Patient 19	39	7	2	2	2	7.34	10	2800	51	1	50	1	6	1	9	94	1	1	2	2	2	1	1	1	2	1	1	3	3	3	1	2	no	NO	SINGLE PREGNANCY	no	YES
20.	K	Patient 20	37	12	7	7	2	7.37	10	2050	45	2	25	1	17	1	10	99	1	2	1	2	2	2	2	1	2	3	3	3	3	3	3	2	mechanical ventilation	NO	SINGLE PREGNANCY	FAS	YES
21.	M	Patient 21	39	11	6	6	1	7.25	10	3580	52	2	50	1	0	115	5	38	1	2	1	1	1	1	1	1	1	3	1	1	3	1	2	2	no	NO	SINGLE PREGNANCY	no	YES
22.	M	Patient 22	40	2	2	2	2	7.32	8	3640	53	2	90	1	4	4	8	93	1	2	1	1	1	1	2	1	1	3	3	1	1	3	3	2	no	NO	SINGLE PREGNANCY	no	YES
23.	K	Patient 23	29	3	1	1	2	6.96	7	1375	45	3	50	2	8	1	9	96	1	1	1	2	2	1	1	1	2	1	1	3	3	3	2	2	no	NO	TWIN PREGNANCY	no	YES
24.	K	Patient 24	29	3	1	1	2	7.05	9	1160	39	3	90	2	5	2	8	93	1	1	1	1	1	2	1	1	2	3	3	3	2	2	2	2	no	NO	TWIN PREGNANCY	no	YES
25.	M	Patient 25	27	7	1	1	2	7.35	8	1415	44	3	75	3	8	1	9	96	1	1	1	1	1	1	1	1	1	1	2	1	2	2	1	1	no	NO	TRIPLET PREGNANCY	no	YES
26.	M	Patient 26	27	7	1	1	2	7.4	7	1115	37	3	75	3	8	2	9	95	1	1	1	1	1	1	1	1	1	1	2	1	1	1	2	2	no	NO	TRIPLET PREGNANCY	no	YES
27.	M	Patient 27	27	7	1	1	2	7.21	8	725	29	3	25	3	9	1	9	96	1	2	1	2	2	1	1	2	2	3	1	3	2	2	2	2	no	YES	TRIPLET PREGNANCY	no	YES
28.	M	Patient 28	32	3	2	2	1	7.27	8	1460	41	2	75	1	7	2	9	95	1	2	1	1	1	1	1	1	1	1	2	3	3	1	1	1	no	NO	SINGLE PREGNANCY	no	YES
29.	K	Patient 29	31	3	2	1	1	7.25	8	1360	39	3	75	2	5	2	8	93	2	2	1	2	2	1	1	1	2	3	1	3	3	1	1	2	no	YES	SINGLE PREGNANCY	no	YES
30.	M	Patient 30	28	6	1	1	2	7.36	7	945	34	3	75	2	7	2	9	95	2	2	1	1	2	1	2	1	2	1	1	1	1	1	2	2	no	YES	SINGLE PREGNANCY	no	YES
												1			2	6	8	86		1	2																	frenectomy performed at 5 days of age

## Sheet: Control group
	GENDER	PATIENT	GESTATIONAL WEEK	AGE AT THE MOMENT OF THE ASSESSMENT	ORDER OF THE CHILD	WHICH PREGNANCY	TYPE OF BIRTH	pH UMBILICAL CORD BLOOD	APGAR AT 5 MINUTES	BIRTH WEIGHT	BIRTH LENGHT	TYPE OF MILK	AIMS centyl	PRECHTL	SOWKUT POINTS	SOWKUT f	SOWKUT sten	SOWKUT centyl	THE USE OF BABY'S PACIFFIER	BREASTFEEDING	BOTTLE FEEDING	ROOTING REFLEX	PHASIC BITE REFLEX	SNOUT REFLEX	JAW JERK REFLEX	GLABELLAR REFLEX	SUCKING REFLEX	FRONTAL MUSCLES	TEMPORALIS MUSCLES	ORIBUCULARIS ORIS	MASSETER MUSCLES	PTERYGOID MUSCLES	INFRAHYOID MUSCLES	STERNOCLEIDOMASTOID MUSCLE	ARTIFICIAL RESPIRATION	TUBE FEEDING	MULTIPLE PREGNANCY	COMORBIDITIES	REHABILITATION
1.	M	Patient 31	39	11	2	2	1	7.22	10	2925	55	3	25	1	4	4	8	91	1	1	1	2	1	2	1	1	1	1	2	3	2	3	3	2	no	no	SINGLE PREGNANCY	NO	NO
2.	K	Patient 32	39	10	2	2	1	7.3	10	3920	59	1	90	1	5	2	8	93	2	1	2	1	1	1	1	1	1	1	3	1	2	2	2	1	no	no	SINGLE PREGNANCY	NO	NO
3.	M	Patient 33	41	5	2	2	1	7.17	10	4000	58	1	75	1	2	6	8	86	1	1	2	1	1	1	1	1	1	1	2	1	2	2	3	2	no	no	SINGLE PREGNANCY	NO	NO
4.	K	Patient 34	39	16	2	2	1	7.18	10	2625	53	1	50	1	2	6	8	86	1	1	2	1	1	1	2	1	1	1	2	3	2	1	3	3	no	no	SINGLE PREGNANCY	NO	NO
5.	K	Patient 35	37	11	1	1	1	7.26	10	2920	50	1	90	1	7	2	9	95	2	1	2	1	1	1	1	1	1	1	2	3	3	2	1	2	no	no	SINGLE PREGNANCY	NO	NO
6.	K	Patient 36	37	9	2	2	1	7.171	10	3960	57	1	75	1	4	4	8	91	1	1	2	1	1	1	2	1	1	1	2	3	3	2	1	2	no	no	SINGLE PREGNANCY	NO	NO
7.	M	Patient 37	40	15	1	1	1	7.32	10	3550	54	1	25	1	5	2	8	93	2	1	2	2	1	1	1	1	1	3	2	1	3	3	2	2	no	no	SINGLE PREGNANCY	NO	NO
8.	K	Patient 38	40	15	1	1	1	7.1	10	3020	53	1	75	3	2	6	8	86	2	1	2	1	1	1	1	1	1	1	2	1	1	1	1	1	no	no	SINGLE PREGNANCY	NO	NO
9.	M	Patient 39	40	6	2	2	1	7.28	10	3375	53	1	50	1	4	4	8	91	1	1	2	2	1	2	1	1	2	1	1	3	2	2	1	2	no	no	SINGLE PREGNANCY	NO	NO
10.	K	Patient 40	38	3	1	1	3	7.26	9	3340	55	1	75	1	8	1	9	96	1	1	1	1	1	2	1	1	1	1	3	1	2	2	2	2	no	no	SINGLE PREGNANCY	NO	NO
11.	M	Patient 41	37	2.5	3	2	2	7.26	10	3840	55	1	50	1	0	115	5	38	1	1	2	1	1	2	1	1	2	1	1	3	3	3	2	2	no	no	SINGLE PREGNANCY	NO	NO
12.	K	Patient 42	28	4	1	1	2	6.9	7	970	31	3	90	1	5	2	8	93	2	2	1	1	1	1	1	1	1	3	1	1	2	2	2	1	no	no	SINGLE PREGNANCY	NO	NO
13.	K	Patient 43	40	6.5	2	2	1	7.28	10	3870	52	1	75	1	0	115	5	38	1	1	2	1	1	1	1	1	1	1	2	1	1	1	2	3	no	no	SINGLE PREGNANCY	NO	NO
14.	K	Patient 44	41	11.5	1	1	2	7.31	10	3350	58	1	75	1	3	2	8	89	1	1	2	1	1	1	1	1	1	2	1	1	2	1	2	2	no	no	SINGLE PREGNANCY	NO	NO
15.	M	Patient 45	38	14	2	1	2	7.11	6	3300	57	1	50	3	3	2	8	89	1	2	1	1	2	1	2	1	1	2	1	2	3	2	1	1	no	no	SINGLE PREGNANCY	NO	NO
16.	K	Patient 46	39	11.5	3	3	2	7.3	10	3825	54	1	90	1	2	6	8	86	1	1	2	1	1	1	1	1	1	1	2	1	2	2	1	3	no	no	SINGLE PREGNANCY	NO	NO
17.	K	Patient 47	39	13	2	2	1	7.27	10	3680	56	1	75	1	5	2	8	93	1	1	2	1	2	1	1	1	1	1	1	1	2	2	2	1	no	no	SINGLE PREGNANCY	NO	NO
18.	M	Patient 48	40	6.5	2	1	2	7.37	10	3000	55	2	75	1	5	2	8	93	2	2	1	1	1	1	2	1	1	1	1	1	3	3	1	3	no	no	SINGLE PREGNANCY	NO	NO
19.	M	Patient 49	39	12	2	1	1	7.454	10	3240	54	2	75	1	2	6	8	86	2	2	1	1	1	1	1	1	1	1	2	2	2	2	1	2	no	no	SINGLE PREGNANCY	NO	NO
20.	K	Patient 50	39	14	1	1	2	7.39	10	2640	52	2	90	1	2	6	8	86	1	2	1	1	1	1	1	1	1	1	2	1	3	2	1	3	no	no	SINGLE PREGNANCY	NO	NO
21.	K	Patient 51	35	9	1	1	2	7.38	10	2100	49	1	50	1	0	115	5	38	2	1	2	2	1	1	1	1	1	1	1	1	2	2	1	3	no	no	TWIN PREGNANCY	patent foramen ovale, ovarian cyst	NO
22.	K	Patient 52	35	9	1	1	2	7.31	10	2090	48	1	75	1	1	14	7	80	2	1	2	2	1	1	1	1	1	1	3	2	2	1	1	3	no	no	TWIN PREGNANCY	NO	NO
23.	M	Patient 53	40	8	1	1	1	7.25	10	3680	53	1	75	1	2	6	8	86	1	1	2	1	1	1	1	1	1	1	3	3	2	2	2	2	no	no	SINGLE PREGNANCY	NO	NO
24.	M	Patient 54	38	3	2	2	1	7.22	10	3210	53	1	75	1	1	14	7	80	2	1	2	1	1	1	1	1	1	1	1	1	2	1	1	3	no	no	SINGLE PREGNANCY	NO	NO
25.	M	Patient 55	36	1	1	1	2	7.229	10	2080	49	3	75	1	1	14	7	80	2	1	1	1	2	1	2	1	1	1	1	1	2	2	1	2	no	no	SINGLE PREGNANCY	NO	NO
26.	K	Patient 56	37	1.5	1	1	2	7.32	10	3240	55	3	75	1	9	1	9	96	1	1	1	1	1	1	1	1	1	1	2	1	2	2	1	2	no	no	SINGLE PREGNANCY	NO	NO
27.	K	Patient 57	40	7	1	1	1	7.339	10	3320	55	2	75	1	1	14	7	80	1	2	1	1	1	1	1	1	1	1	1	2	2	2	1	1	no	no	SINGLE PREGNANCY	NO	NO
28.	M	Patient 58	38	13	1	1	2	7.3	10	3440	56	1	50	1	4	4	8	91	2	2	1	1	1	1	2	1	1	1	2	1	3	3	1	2	no	no	SINGLE PREGNANCY	NO	YES
29.	K	Patient 59	33	23	3	3	2	7.25	10	2180	46	2	90	1	2	6	8	86	1	2	1	1	2	2	1	1	1	1	2	1	3	3	1	1	no	no	TWIN PREGNANCY	anemia	YES
30.	K	Patient 60	33	23	3	3	2	7.29	10	2380	44	2	90	1	4	4	8	91	1	2	1	1	1	2	2	1	1	1	1	2	2	2	1	2	no	no	TWIN PREGNANCY	anemia	YES

## Sheet: legend
MODE OF DELIVERY
1- natural
2- cesarean section
3- assisted using a vacuum extractor or forceps
TYPE OF FOOD
1- breast milk
2- formula
3- breast milk and formula
4- caloric mixture
PRECHTL
1- Circular/writhing movements
2- Poor repertoire (PR)
3- Cramped-synchronized movements (CS)
4- Chaotic movements (Ch)
5- Hypokinesia
PACIFIER/BREASTFEEDING/BOTTLE FEEDING
1- yes
2- no
REFLEXES
1- present
2- absence
MUSCLES
1- normal
2- excessive tense on one side
3- excessive tense on both sides
